# Supplementary material
Source: Springer Nature journal article supplement (https://www.springermedizin.de/resource/supplementary/12889_2012_4088_MOESM1_ESM.pdf/9491568)
Supplement: MOESM1 [file 9491568]

Study clinics  
n = 9560

Non-study clinics, n = 17403

Met inclusion  
criteria  
n = 5593

Deceased, n = 164  
Emigrated, n = 24  
Unknown address, n = 14

Received  
questionnaire  
n = 5391

Returns, n = 32  
Declined, n = 65  
No answer, n = 2142

Answered  
questionnaire  
n = 3152

Not eligible for intervention  
n = 1208  
No interest in HEPA, n = 929  
Already met HEPA, n = 249  
Language problem, n = 30

Eligible for  
intervention  
n = 1944
